# Supplementary material for: Leukemia inhibitory factor inhibits erythropoietin-induced myelin gene expression in oligodendrocytes
Source: Mol Med. 2018 Sep 27;24:51. doi: 10.1186/s10020-018-0052-3 (PMC6161334; doi:10.1186/s10020-018-0052-3)
Supplement: Supplementary file 3 — Genes increased by LIF and unchanged or decreased by differentiation or EPO at 1 h. The genes increased more than 1.5-fold (log2 FC ≥ 0.58), BH adj. P value < 0.05 in EPO + LIF vs EPO-treated differentiating cells are listed; ns = not significant. For genes represented by 2 probes (*) consistently increased by LIF, only the one increased more significantly is shown (xlsx file). (XLSX 20 kb) [file 10020_2018_52_MOESM3_ESM.xlsx]

## Sheet: Sheet1
Additional File 3. Genes increased by LIF and unchanged or decreased by differentiation or EPO at 1h
				EPO+LIF vs EPO			dif vs undif
ProbeName	GeneSymbol	GenbankAccession	GeneName	Log2 FC	P value	BH adj. P value	Log2 FC	P value	BH adj. P value
Upregulated by LIF and unchanged by differentiation or EPO (47)
A_44_P271658	Reg3b	NM_053289	regenerating islet-derived 3 beta	3.10533	2.55387e-06	0.00121544	-0.0533227	ns	ns
A_64_P092170	Igtp	NM_001008765	interferon gamma induced GTPase	2.35998	4.23619e-05	0.00909918	0.0766638	ns	ns
A_64_P126969	Cyp1b1	NM_012940	cytochrome P450, family 1, subfamily b, polypeptide 1	2.12931	5.22196e-06	0.00194996	-0.237777	ns	ns
A_44_P228942	Runx1	NM_017325	runt-related transcription factor 1	1.98281	4.69536e-07	0.000392986	-0.674883	0.00394386	ns
A_42_P577431	Bcl3	NM_001109422	B-cell CLL/lymphoma 3	4.82988	5.04329e-10	6.12054e-06	0.302763	0.00499188	ns
A_64_P073904	Prom1	NM_021751	prominin 1	1.95531	1.7865e-05	0.00456442	-0.0362718	ns	ns
A_64_P103269	Ninl	XM_006224699	ninein-like	1.9419	3.22064e-05	0.00704246	0.0140191	ns	ns
A_64_P124535	Reg1a	NM_012641	regenerating islet-derived 1 alpha	1.90282	0.000456609	0.0499226	-0.1686	ns	ns
A_44_P965869	Arid3b	NM_001109001	AT rich interactive domain 3B (Bright like)	1.8667	0.000272842	0.0344918	0.0993836	ns	ns
A_64_P107866	Myd88	NM_198130	myeloid differentiation primary response 88	1.64499	1.12551e-05	0.00337265	-0.491183	ns	ns
A_64_P061212	Zfp703	NM_001109425	zinc finger protein 703	1.61858	0.000180982	0.0252459	-1.248	ns	ns
A_43_P12276	Vax1	NM_022636	ventral anterior homeobox 1	1.51915	0.000111252	0.018002	0.0155381	ns	ns
A_64_P128438	Irf1	NM_012591	interferon regulatory factor 1	1.51769	1.51001e-06	0.000796758	-0.267845	ns	ns
A_42_P722994	Ripk1*	NM_001107350	receptor (TNFRSF)-interacting serine-threonine kinase 1	1.46158	5.14739e-06	0.00195215	0.244427	0.0077048	ns
A_42_P610788	Ampd3	NM_031544	adenosine monophosphate deaminase 3	1.36402	3.09266e-05	0.00688671	-0.0807232	ns	ns
A_64_P164330	Tead3	NM_001098216	TEA domain family member 3	1.34138	3.6351e-06	0.00152123	-0.266055	0.00233031	0.0477713
A_43_P15837	Ntrk2	M55293	neurotrophic tyrosine kinase, receptor, type 2	1.32437	7.89929e-05	0.0142023	-0.80353	0.027416	ns
A_64_P043561	LOC494538	XM_002725567	ABP beta	1.30881	0.000228299	0.0297918	0.320044	ns	ns
A_44_P156211	Itpkc	NM_178094	inositol-trisphosphate 3-kinase C	1.14451	4.60285e-05	0.00963106	0.188982	ns	ns
A_43_P11044	G0s2	NM_001009632	G0/G1switch 2	1.11916	1.30321e-05	0.00359449	-0.513302	0.0131226	ns
A_42_P475623	Klf5	NM_053394	Kruppel-like factor 5	1.0823	8.16377e-06	0.00287176	-1.17222	0.00341084	ns
A_44_P504192	Chst2	XM_006243553	carbohydrate (N-acetylglucosamine-6-O) sulfotransferase 2	1.05037	0.000111894	0.017986	-0.629713	ns	ns
A_64_P069400	Irf9	NM_001012041	interferon regulatory factor 9	1.01338	0.00019572	0.0263917	-0.375828	ns	ns
A_64_P048117	Foxp3	NM_001108250	forkhead box P3	1.01015	0.000351381	0.0408072	-0.523	ns	ns
A_43_P16529	Gadd45b	NM_001008321	growth arrest and DNA-damage-inducible, beta	0.976665	2.36998e-05	0.00563963	0.348123	ns	ns
A_42_P662683	Slc41a1	NM_001108855	solute carrier family 41 (magnesium transporter), member 1	0.922268	5.43912e-05	0.0108212	-0.0957612	ns	ns
A_64_P000967	Col2a1	NM_012929	collagen, type II, alpha 1	0.901379	0.00033125	0.0390296	0.477454	ns	ns
A_44_P655718	Fam72a	NM_001081451	family with sequence similarity 72, member A	0.886645	1.64915e-07	0.000210674	-0.458332	0.000771843	0.0264981
A_44_P540517	RGD1564664	NM_001110055	similar to LOC387763 protein	0.862841	0.000298721	0.0362527	-0.658435	0.0139611	ns
A_43_P12572	Cd200	NM_031518	Cd200 molecule	0.846865	0.000158658	0.0231984	-0.150383	ns	ns
A_64_P090558	Lrp2	NM_030827	low density lipoprotein receptor-related protein 2	0.840975	1.06961e-06	0.000649039	-0.54908	ns	ns
A_44_P217295	Kcna2	NM_012970	potassium voltage-gated channel, shaker-related subfamily, member 2	0.802662	4.90696e-05	0.0100086	-0.324874	ns	ns
A_64_P144023	Gcom1	NM_001014211	GRINL1A complex locus 1	0.793672	4.80357e-07	0.000388641	-0.210418	ns	ns
A_64_P102942	Rgcc	NM_054008	regulator of cell cycle	0.775889	0.000374751	0.0425044	-0.498741	0.0074447	ns
A_64_P028803	Il10rb	NM_001107111	interleukin 10 receptor, beta	0.766426	1.10208e-05	0.00334372	0.218617	ns	ns
A_64_P012987	Akna	NM_001108668	AT-hook transcription factor	0.75947	0.000184886	0.0254975	-0.115086	ns	ns
A_44_P1047158	Tnip2	NM_001024771	TNFAIP3 interacting protein 2	0.725806	6.24015e-05	0.0118329	0.268901	ns	ns
A_64_P043289	Peli2	NM_001107259	pellino E3 ubiquitin protein ligase family member 2	0.69383	0.000346937	0.0406805	-0.114672	ns	ns
A_64_P025255	Sall4	XM_006224745	spalt-like transcription factor 4	0.688982	0.000125734	0.0194383	-0.354705	ns	ns
A_44_P488475	Iqsec1	XM_006224989	IQ motif and Sec7 domain 1	0.664873	3.15769e-05	0.00696759	0.00948692	ns	ns
A_43_P10996	Atp1b2	NM_012507	ATPase, Na+/K+ transporting, beta 2 polypeptide	0.651136	2.18367e-05	0.00530021	-0.295825	0.00772379	ns
A_64_P019901	Ythdf2	NM_001047099	YTH domain family, member 2	0.646685	1.05997e-05	0.00325667	-0.246592	ns	ns
A_64_P096532	Slc39a1	NM_001134577	solute carrier family 39 (zinc transporter), member 1	0.62714	0.00020618	0.0274967	-0.0940276	ns	ns
A_64_P091988	Stat1	NM_001034164	signal transducer and activator of transcription 1	0.614334	0.000298003	0.0363474	0.143898	ns	ns
A_44_P354665	Zfp672	NM_001007669	zinc finger protein 672	0.609885	5.81925e-06	0.00214007	-0.631122	0.0188888	ns
A_64_P120861	Efna1	NM_053599	ephrin A1	0.609665	0.000377004	0.0425611	0.642587	0.034079	ns
A_43_P12743	Atp7a	NM_052803	ATPase, Cu++ transporting, alpha polypeptide	0.595873	0.000297507	0.0364701	0.076211	ns	ns
Upregulated by LIF and downregulated by differentiation (28)
A_43_P11616	Atf3	NM_012912	activating transcription factor 3	3.19881	2.22162e-10	5.39232e-06	-2.03912	1.84233e-05	0.00451686
A_44_P1016829	Trib1	NM_023985	tribbles pseudokinase 1	3.11744	8.35069e-06	0.00285476	-2.05738	6.13764e-05	0.00767901
A_64_P029805	Junb	NM_021836	jun B proto-oncogene	3.01906	3.56743e-06	0.0015191	-0.98134	0.000556643	0.0222584
A_43_P12768	Bhlhe40	NM_053328	basic helix-loop-helix family, member e40	2.84494	1.00387e-05	0.00320603	-2.04231	3.31222e-07	0.000803943
A_64_P129563	Arid5a	NM_001034934	AT rich interactive domain 5A (Mrf1 like)	2.76994	3.0186e-08	4.57921e-05	-0.930277	6.08276e-05	0.00768963
A_44_P473928	Spry1	NM_001106427	sprouty homolog 1, antagonist of FGF signaling (Drosophila)	2.58637	1.7551e-07	0.000212998	-1.98362	0.000396865	0.0191505
A_42_P535644	Adamts1	NM_024400	ADAM metallopeptidase with thrombospondin type 1 motif, 1	2.48536	2.9105e-05	0.00654108	-1.36554	0.000584855	0.0228961
A_64_P133289	Dact1	XM_576044	dishevelled-binding antagonist of beta-catenin 1	2.4254	9.73397e-07	0.000605802	-1.97061	4.58264e-05	0.00670059
A_64_P125883	Socs3	NM_053565	suppressor of cytokine signaling 3	1.89184	2.57755e-05	0.0059583	-2.26923	3.76304e-05	0.00604878
A_44_P320752	Rasl11a	NM_001002829	RAS-like family 11 member A	1.65547	2.57626e-06	0.00120252	-1.70274	0.000251949	0.0148071
A_44_P437896	Bdnf	NM_012513	brain-derived neurotrophic factor	1.60781	6.62349e-05	0.0123666	-2.40739	1.34787e-05	0.00389471
A_44_P787936	Stat3	NM_012747	signal transducer and activator of transcription 3 (acute-phase response factor)	1.59236	6.05934e-05	0.0117658	-1.67804	0.000327281	0.0169016
A_44_P116591	Cx3cl1	NM_134455	chemokine (C-X3-C motif) ligand 1	1.54074	5.9496e-07	0.000437602	-1.28673	1.33127e-05	0.00389309
A_42_P695042	Csf1	NM_023981	colony stimulating factor 1 (macrophage)	1.45129	5.88683e-09	2.38142e-05	-0.596407	1.44663e-05	0.00394523
A_64_P029831	Irf2bpl	NM_001012470	interferon regulatory factor 2 binding protein-like	1.39655	0.00033053	0.0391347	-1.05426	0.00222397	0.0466956
A_44_P221077	Tmem100	NM_001017479	transmembrane protein 100	1.37955	8.64146e-05	0.015199	-0.586655	0.00205825	0.0446052
A_43_P15253	Icam1	NM_012967	intercellular adhesion molecule 1	1.17557	2.09059e-09	1.69143e-05	-1.18152	1.36004e-05	0.00388363
A_64_P069819	Rrp8	NM_001008346	ribosomal RNA processing 8, methyltransferase, homolog (yeast)	1.02111	9.58567e-07	0.000612272	-1.69581	1.61583e-05	0.00417229
A_64_P101321	Frmpd1	XM_006225279	FERM and PDZ domain containing 1	0.943228	1.04062e-05	0.0032382	-1.09368	8.70898e-05	0.00880769
A_42_P640277	Enc1	NM_001003401	ectodermal-neural cortex 1	0.909467	2.81295e-07	0.000296852	-0.999053	4.29712e-05	0.00643825
A_42_P565301	B4galt5	NM_001108608	UDP-Gal:betaGlcNAc beta 1,4-galactosyltransferase, polypeptide 5	0.815193	2.04057e-05	0.0050029	-0.82136	0.00019539	0.0131008
A_64_P018821	Stk35	NM_001107773	serine/threonine kinase 35	0.810899	0.000364517	0.0419315	-1.00186	0.00182785	0.0416188
A_42_P801379	Fgfrl1	NM_199114	fibroblast growth factor receptor-like 1	0.788526	4.8143e-06	0.00191562	-0.705375	0.00066093	0.0245668
A_42_P487832	Rnf219	NM_001108389	ring finger protein 219	0.691665	4.83738e-07	0.000378751	-0.766376	0.0022504	0.0469663
A_64_P044295	Fam181b	NM_001109150	family with sequence similarity 181, member B	0.675496	9.32957e-06	0.0030193	-1.29981	0.0014568	0.0368328
A_44_P363291	Kcnk10	NM_023096	potassium channel, subfamily K, member 10	0.638095	0.000211646	0.0280714	-1.20503	1.91912e-05	0.00452243
A_44_P171321	Coq10b	NM_001009671	coenzyme Q10 homolog B (S. cerevisiae)	0.626189	8.27135e-06	0.00286803	-0.95376	3.45887e-05	0.00583011
A_64_P009803	Btg2	NM_017259	BTG family, member 2	0.593321	0.000131401	0.0201859	-1.26025	0.000472309	0.0206557
The genes increased more than 1.5-fold (log2 FC ≥ 0.58), BH adj. P value < 0.05 in EPO+LIF vs EPO-treated differentiating cells are listed; ns=not significant.
For genes represented by 2 probes (*) consistently increased by LIF, only the one increased more significantly is shown.
